# Supplementary material for: Structural insights into catalytical capability for CPT11 hydrolysis and substrate specificity of a novel marine microbial carboxylesterase, E93
Source: Frontiers journal article supplement (doi:10.3389/fmicb.2022.1081094), 2023-01-11
Supplement: Data_Sheet_1.PDF [file Data_Sheet_1.PDF]

## Supplementary materials

### Figure S1. Polygenetic analysis of E93

Phylogenetic tree based on amino acid sequences of E93 and its homologous proteins. Sequence alignment was performed using ClustalW. The phylogenetic tree was constructed by MEGA software. Bootstrap values were based on 1,000 replicates and the values higher than 50 % were shown in the tree. The scale bar measured the number of amino acid substitutions per site. E93 highlighted by red box.

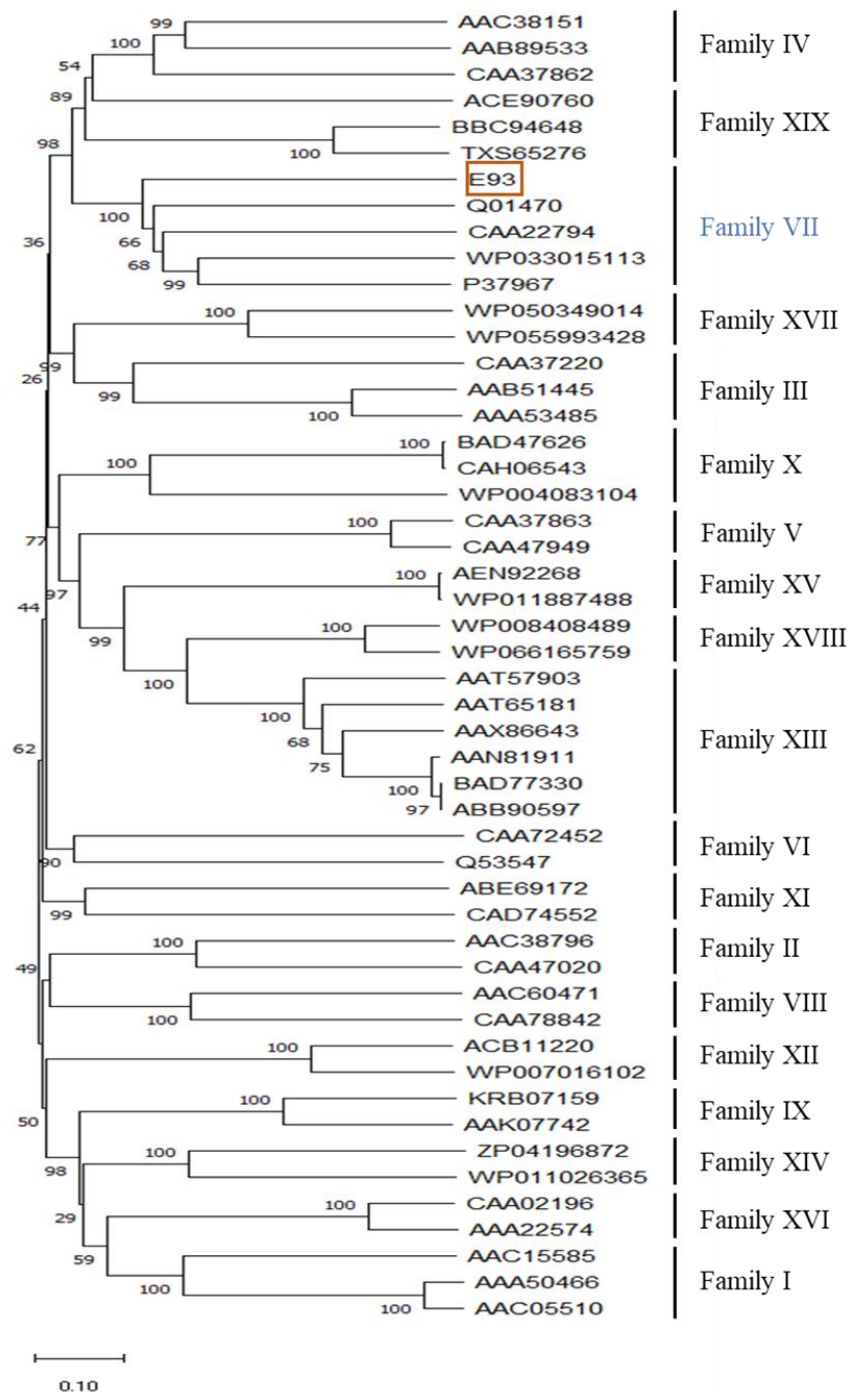

## Figure S2. Multiple sequence alignment of E93 with similar proteins

Amino acids conserved in all sequences used for alignment were labeled with the red-colored background. Comparative conserved amino acids were labeled with red color. The catalytic triad is highlighted by the red pentagrams. The mutated sites were highlighted with blue frame, and the catalytic triad were highlighted with black frame.

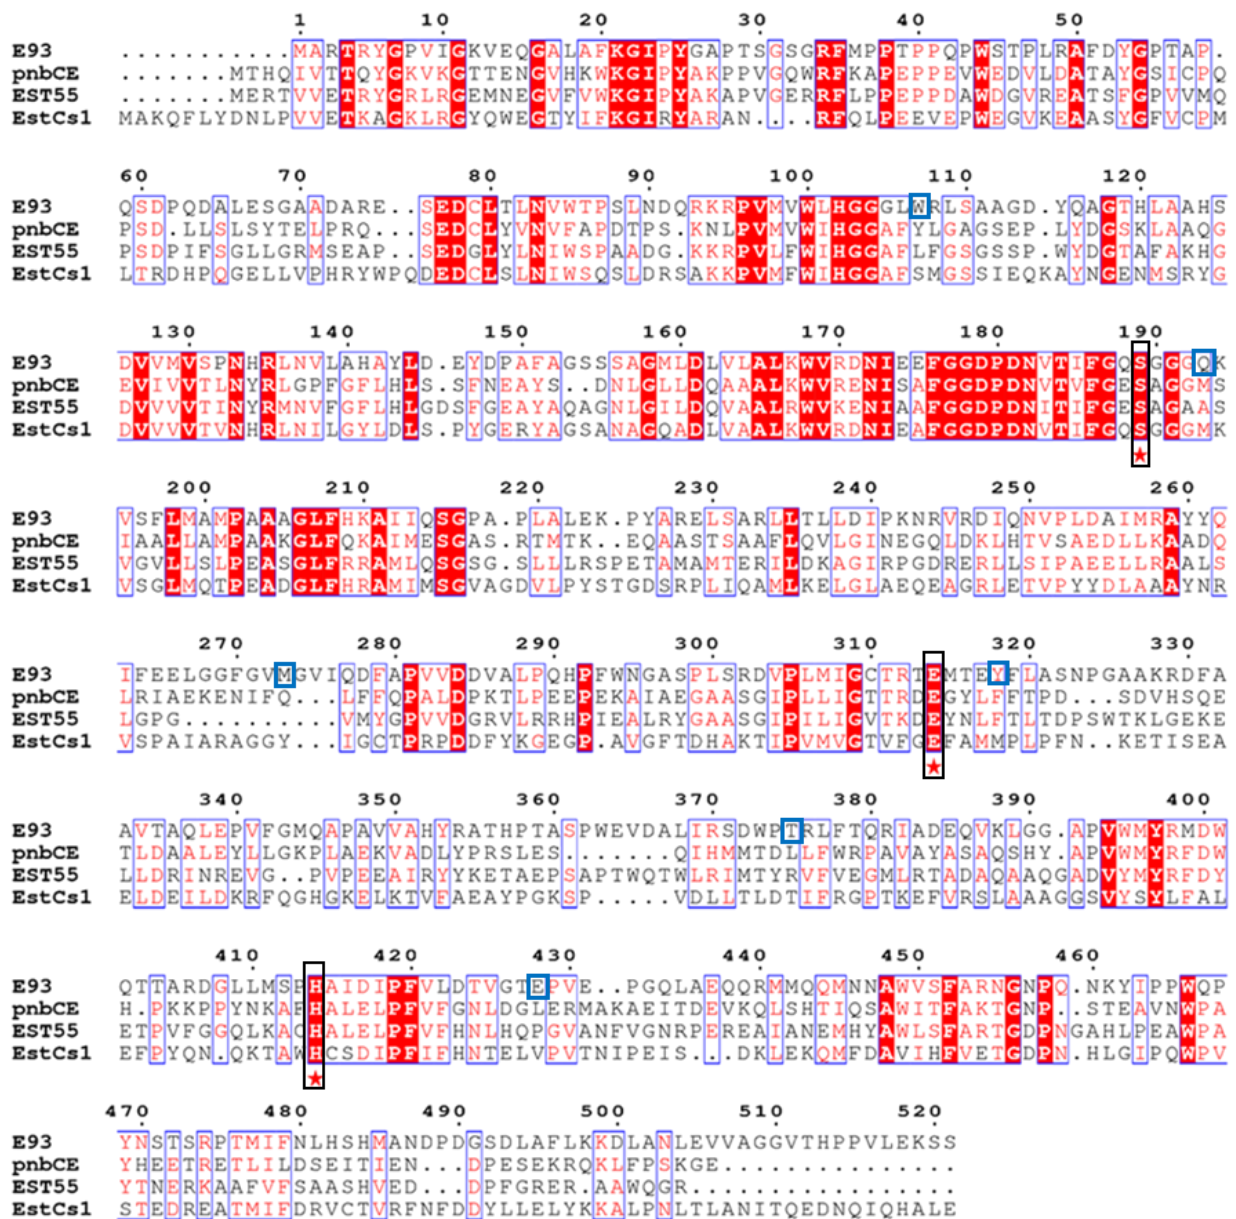

**Table S1: Data collection of E93**

| Item                               | E93                                                        |
|------------------------------------|------------------------------------------------------------|
| PDB No.                            | 7X8L                                                       |
| <b>Data collection</b>             |                                                            |
| Wavelength                         | 0.97923                                                    |
| Resolutions (Å)                    | 35.32 - 1.77 (1.833 - 1.77) <sup>a</sup>                   |
| Space group                        | P 2 <sub>1</sub> 2 <sub>1</sub> 2 <sub>1</sub>             |
| Unit cell (Å, °)                   | a = 44.85 b = 91.67 c = 110.82<br>$\alpha=\beta=\gamma=90$ |
| Unique reflections                 | 45256 (4433)                                               |
| Completeness (%)                   | 99.65 (99.19)                                              |
| Mean I/ $\sigma$ (I)               | 23.91 (6.44)                                               |
| R-merge <sup>b</sup>               | 0.09239 (0.6847)                                           |
| R-meas                             | 0.09595 (0.7094)                                           |
| R-pim                              | 0.02559 (0.1844)                                           |
| CC1/2                              | 0.999 (0.966)                                              |
| <b>Refinement statistics</b>       |                                                            |
| Reflections used in refinement     | 45246 (4431)                                               |
| R-work <sup>c</sup>                | 0.1678 (0.2032)                                            |
| R-free <sup>d</sup>                | 0.1924 (0.2470)                                            |
| No. atoms (protein)                | 3957                                                       |
| No. atoms (water)                  | 274                                                        |
| <b>RMSD</b>                        |                                                            |
| Bond lengths (Å)                   | 0.008                                                      |
| Bond angles (°)                    | 1.02                                                       |
| Ramachandran favored (%)           | 96.45                                                      |
| Ramachandran allowed (%)           | 3.55                                                       |
| Ramachandran outliers (%)          | 0                                                          |
| Average B-factor (Å <sup>2</sup> ) | 20.97                                                      |

<sup>a</sup> Statistics for the highest-resolution shell are shown in parentheses.

<sup>b</sup>  $R_{\text{merge}} = \sum |I_i - \langle I \rangle| / \sum |I_i|$ , where  $I_i$  is the intensity of an individual reflection and  $\langle I \rangle$  is the average intensity of that reflection.

<sup>c</sup>  $R_{\text{work}} = \sum ||F_o| - |F_c|| / \sum |F_o|$ , where  $F_o$  and  $F_c$  are the observed and calculated structure factors for reflections, respectively.

<sup>d</sup>  $R_{\text{free}}$  was calculated as  $R_{\text{work}}$  using the 5 % of reflections that were selected randomly and omitted from refinement.

**Table S2: Hydrolysis of prodrug CPT11 by E93 and mutants**

| Enzyme    | Substrate | <i>K<sub>m</sub></i> | <i>K<sub>cat</sub></i>     | <i>K<sub>cat</sub>/K<sub>m</sub></i> |
|-----------|-----------|----------------------|----------------------------|--------------------------------------|
|           |           | <i>mM</i>            | $10^{-3} \text{ min}^{-1}$ | $\text{min}^{-1} \text{ mM}^{-1}$    |
| E93       | CPT11     | 70.17 ± 7.07         | 40.08 ± 1.22               | 0.57 ± 0.06                          |
| E93_W107A |           | 59.63 ± 4.37         | 104.51 ± 8.19              | 1.75 ± 0.22                          |
| E93_M273A |           | 58.05 ± 5.3          | 77.29 ± 3.20               | 1.33 ± 0.15                          |
| E93_Q193A |           | 81.01 ± 8.44         | 5.41 ± 0.31                | 0.067 ± 0.01                         |
| E93_Y318A |           | 73.61 ± 7.25         | 20.26 ± 1.03               | 0.28 ± 0.04                          |
| E93_Y318F |           | 73.46 ± 7.22         | 22.02 ± 1.12               | 0.30 ± 0.04                          |
| E93_T375A |           | 74.20 ± 8.70         | 19.10 ± 1.75               | 0.26 ± 0.05                          |
| E93_T375I |           | 75.39 ± 7.33         | 21.45 ± 2.04               | 0.28 ± 0.05                          |
| E93_E428A |           | 69.62 ± 5.79         | 40.01 ± 2.77               | 0.57 ± 0.1                           |
| E93_S189A |           | N.D. <sup>a</sup>    | N.D. <sup>a</sup>          | N.D. <sup>a</sup>                    |

<sup>a</sup> No detectable hydrolysis.**Table S3: Hydrolysis of NPC by E93 and mutants**

| Enzyme    | Substrate | <i>K<sub>m</sub></i> | <i>K<sub>cat</sub></i>     | <i>K<sub>cat</sub>/K<sub>m</sub></i> |
|-----------|-----------|----------------------|----------------------------|--------------------------------------|
|           |           | <i>μM</i>            | $10^{-3} \text{ min}^{-1}$ | $\text{min}^{-1} \text{ mM}^{-1}$    |
| E93       | NPC       | 75.66 ± 6.03         | 35.40 ± 1.70               | 0.47 ± 0.05                          |
| E93_W107A |           | 63.11 ± 5.73         | 44.81 ± 2.17               | 0.71 ± 0.08                          |
| E93_M273A |           | 66.11 ± 4.12         | 70.94 ± 6.79               | 1.07 ± 0.10                          |
| E93_Q193A |           | 71.29 ± 5.35         | 30.69 ± 2.27               | 0.43 ± 0.05                          |
| E93_Y318A |           | 55.47 ± 5.17         | 40.87 ± 3.07               | 0.74 ± 0.10                          |
| E93_Y318F |           | 76.62 ± 8.19         | 31.52 ± 2.05               | 0.41 ± 0.06                          |
| E93_T375A |           | 75.09 ± 7.92         | 32.16 ± 2.86               | 0.43 ± 0.07                          |
| E93_T375I |           | 75.14 ± 7.16         | 31.07 ± 2.03               | 0.41 ± 0.03                          |
| E93_E428A |           | 85.07 ± 9.4          | 23.80 ± 2.34               | 0.28 ± 0.05                          |
| E93_S189A |           | N.D. <sup>a</sup>    | N.D. <sup>a</sup>          | N.D. <sup>a</sup>                    |

<sup>a</sup> No detectable hydrolysis.

**Table S4: Hydrolysis of *p*-NP hexanoate (C6) by E93 and mutants**

| Enzyme    | Substrate | <i>K<sub>m</sub></i> (mM) | <i>K<sub>cat</sub></i> ( $\times 10^5$ S <sup>-1</sup> ) | <i>K<sub>cat</sub>/K<sub>m</sub></i> ( $\times 10^6$ S <sup>-1</sup> mM <sup>-1</sup> ) |
|-----------|-----------|---------------------------|----------------------------------------------------------|-----------------------------------------------------------------------------------------|
| E93       | C6        | 0.18 $\pm$ 0.011          | 4.31 $\pm$ 0.32                                          | 2.34 $\pm$ 0.23                                                                         |
| E93_W107A |           | 0.21 $\pm$ 0.018          | 3.48 $\pm$ 0.15                                          | 1.63 $\pm$ 0.09                                                                         |
| E93_M273A |           | 0.39 $\pm$ 0.025          | 3.06 $\pm$ 0.08                                          | 0.78 $\pm$ 0.20                                                                         |
| E93_Q193A |           | 0.10 $\pm$ 0.01           | 12.86 $\pm$ 1.01                                         | 12.49 $\pm$ 0.13                                                                        |
| E93_Y318A |           | 0.18 $\pm$ 0.02           | 3.96 $\pm$ 0.19                                          | 2.20 $\pm$ 0.15                                                                         |
| E93_Y318F |           | 0.19 $\pm$ 0.02           | 4.00 $\pm$ 0.27                                          | 2.16 $\pm$ 0.11                                                                         |
| E93_T375A |           | 0.13 $\pm$ 0.01           | 7.99 $\pm$ 0.41                                          | 6.01 $\pm$ 0.21                                                                         |
| E93_T375I |           | 0.11 $\pm$ 0.01           | 8.22 $\pm$ 0.43                                          | 7.51 $\pm$ 0.12                                                                         |
| E93_E428A |           | 0.18 $\pm$ 0.02           | 4.29 $\pm$ 0.21                                          | 2.42 $\pm$ 0.08                                                                         |
| E93_S189A |           | N.D. <sup>a</sup>         | N.D. <sup>a</sup>                                        | N.D. <sup>a</sup>                                                                       |

<sup>a</sup> No detectable hydrolysis.

**Table S5: Hydrolysis of *p*-NP butyrate (C4) by E93 and mutants of Thr<sub>375</sub>**

| Enzyme    | Substrate | <i>K<sub>m</sub></i> (mM) | <i>K<sub>cat</sub></i> ( $\times 10^5$ S <sup>-1</sup> ) | <i>K<sub>cat</sub>/K<sub>m</sub></i> ( $\times 10^6$ S <sup>-1</sup> mM <sup>-1</sup> ) |
|-----------|-----------|---------------------------|----------------------------------------------------------|-----------------------------------------------------------------------------------------|
| E93       | C4        | 0.21 $\pm$ 0.02           | 3.38 $\pm$ 0.11                                          | 1.65 $\pm$ 0.33                                                                         |
| E93_T375I |           | 0.10 $\pm$ 0.01           | 9.76 $\pm$ 0.63                                          | 9.48 $\pm$ 0.80                                                                         |

**Table S6: Primers for E93 and mutants**

| Primer      | Sequence                         |
|-------------|----------------------------------|
| E93-F       | tcgcgatccatgccccgactcgctatg      |
| E93-R       | atttcggccgctcatgaagacttctccaatag |
| E93_W107A-F | cggcggcctggctcgcttg              |
| E93_W107A-R | ccgacaagcgagccaggccg             |
| E93_M273A-F | gcttcgggtgctcgctggagtga          |
| E93_M273A-R | aatcctgaatcactccagcgacacc        |
| E93_Q193A-F | ggcgggggagcgaaagtgtc             |
| E93_Q193A-R | ggaaggacacttctgctcccc            |
| E93_Y318A-F | aatgaccgaggcttctgcccagc          |
| E93_Y318A-R | gccaggaaagcctcggtcatttgg         |
| E93_Y318F-F | aatgaccgagtttctgcccagc           |
| E93_Y318F-R | gctggccaggaaaaactcggtcatt        |
| E93_T375A-F | tccgactggccagcccggctgtca         |
| E93_T375A-R | tgaacagccgggctggccagtcgga        |
| E93_T375I-F | tccgactggccaatccggctgtca         |
| E93_T375I-R | tgaacagccggattggccagtcgga        |
| E93_E428A-F | acggtcggcaccgcaccggtcgagc        |
| E93_E428A-R | ctcgaccgggtgcgggtgccgaccgtgt     |
